# Supplementary material for: Secukinumab in Pediatric Patients with Plaque Psoriasis: Pooled Safety Analysis from Two Phase 3 Randomized Clinical Trials
Source: PubMed Central journal article supplement — Am J Clin Dermatol. 2023 Jun 21;24(5):821–35. doi: 10.1007/s40257-023-00782-8 (PMC10460311; doi:10.1007/s40257-023-00782-8), 2023-06-21
Supplement: 40257_2023_782_MOESM1_ESM.pdf [file 40257_2023_782_MOESM1_ESM.pdf]

## **Title**

Secukinumab in Pediatric Patients with Plaque Psoriasis: Pooled Safety Analysis from Two Phase 3 Randomized Clinical Trials

**Running heading:** Pooled Safety of Secukinumab in Pediatric Patients with Plaque Psoriasis

## **Author information**

Michael Sticherling<sup>1\*</sup>, Arjen F Nikkels<sup>2</sup>, Ashraf M Hamza<sup>3</sup>, Pearl Kwong<sup>4</sup>, Jacek C Szepietowski<sup>5</sup>, Mahira El Sayed<sup>6</sup>, Pierre-Dominique Ghislain<sup>7</sup>, Alkes A Khotko<sup>8</sup>, Manmath Patekar<sup>9</sup>, Christine-Elke Ortmann<sup>9</sup>, Pascal Forrer<sup>9</sup>, Philemon Papanastasiou<sup>9</sup>, Deborah Keefe<sup>10</sup>

<sup>1</sup>Friedrich-Alexander-University of Erlangen-Nürnberg (FAU) Department of Dermatology, University Hospital Erlangen, Erlangen, Germany.; <sup>2</sup>Department of Dermatology, University Hospital Centre, CHU of Sart Tilman, University of Liège, 4000, Liège, Belgium; <sup>3</sup>Department of Dermatology & Andrology, Alexandria University, Alexandria, Egypt; <sup>4</sup>Solutions through Advanced Research, Jacksonville, Florida, USA; <sup>5</sup>Department of Dermatology, Venereology and Allergology, Medical University, Wrocław, Poland; <sup>6</sup>Ain Shams University, Cairo, Egypt; <sup>7</sup>Cliniques Universitaires St-Luc UCL, Brussels, Belgium; <sup>8</sup>GBUZ Clinical Dermatology and Venereological Dispensary, Krasnodar, Russia; <sup>9</sup>Novartis Pharma AG, Basel, Switzerland; <sup>10</sup>Novartis Pharmaceuticals Corporation, East Hanover, New Jersey, USA

## **\*Corresponding author**

Prof. Michael Sticherling  
Hautklinik, Universitätsklinikum Erlangen,  
Ulmenweg 18, 91054, Erlangen, Germany  
E-Mail: [michael.sticherling@uk-erlangen.de](mailto:michael.sticherling@uk-erlangen.de)

## Electronic Supplementary Material

**Table S1. Demographic and baseline disease characteristics in the adult pool**

| Characteristics                                                                                                                                                                                                                                                                                                                                                                                                                                                                                                         | SEC 150 mg | SEC 300 mg | Any SEC     | PBO        | ETN        |
|-------------------------------------------------------------------------------------------------------------------------------------------------------------------------------------------------------------------------------------------------------------------------------------------------------------------------------------------------------------------------------------------------------------------------------------------------------------------------------------------------------------------------|------------|------------|-------------|------------|------------|
|                                                                                                                                                                                                                                                                                                                                                                                                                                                                                                                         | N=692      | N=691      | N=1383      | N=694      | N=326      |
| <b>Age, years, mean±SD</b>                                                                                                                                                                                                                                                                                                                                                                                                                                                                                              | 45.1±13.37 | 44.9±13.31 | 45.0±13.34  | 44.7±12.78 | 43.7±12.95 |
| <b>Female, n (%)</b>                                                                                                                                                                                                                                                                                                                                                                                                                                                                                                    | 207 (29.9) | 214 (31.0) | 421 (30.4)  | 208 (30.0) | 94 (28.8)  |
| <b>Body weight, kg, mean±SD</b>                                                                                                                                                                                                                                                                                                                                                                                                                                                                                         | 86.6±23.15 | 86.6±23.21 | 86.6±23.17  | 86.0±22.58 | 84.6±20.51 |
| <b>Caucasian, n (%)</b>                                                                                                                                                                                                                                                                                                                                                                                                                                                                                                 | 499 (72.1) | 505 (73.1) | 1004 (72.6) | 510 (73.5) | 219 (67.2) |
| <b>Baseline PASI score, mean±SD</b>                                                                                                                                                                                                                                                                                                                                                                                                                                                                                     | 22.8±9.99  | 22.7±9.37  | 22.7±9.68   | 22.5±9.64  | 23.2±9.81  |
| PASI score ≤20, n (%)                                                                                                                                                                                                                                                                                                                                                                                                                                                                                                   | 368 (53.2) | 354 (51.2) | 722 (52.2)  | 365 (52.6) | 163 (50.0) |
| PASI score >20, n (%)                                                                                                                                                                                                                                                                                                                                                                                                                                                                                                   | 324 (46.8) | 337 (48.8) | 661 (47.8)  | 327 (47.1) | 163 (50.0) |
| <b>Baseline total BSA, mean±SD</b>                                                                                                                                                                                                                                                                                                                                                                                                                                                                                      | 33.3±18.90 | 33.0±18.76 | 33.2±18.82  | 32.2±17.77 | 33.6±17.97 |
| <b>Baseline IGA mod 2011 score, n (%)</b>                                                                                                                                                                                                                                                                                                                                                                                                                                                                               |            |            |             |            |            |
| 3 (moderate disease)                                                                                                                                                                                                                                                                                                                                                                                                                                                                                                    | 439 (63.4) | 436 (63.1) | 875 (63.3)  | 424 (61.1) | 195 (59.8) |
| 4 (severe disease)                                                                                                                                                                                                                                                                                                                                                                                                                                                                                                      | 253 (36.6) | 255 (36.9) | 508 (36.7)  | 268 (38.6) | 131 (40.2) |
| <b>Severity of psoriasis<sup>a</sup>, n (%)</b>                                                                                                                                                                                                                                                                                                                                                                                                                                                                         |            |            |             |            |            |
| Moderate                                                                                                                                                                                                                                                                                                                                                                                                                                                                                                                | 499 (72.1) | 493 (71.3) | 992 (71.7)  | 490 (70.6) | 226 (69.3) |
| Severe                                                                                                                                                                                                                                                                                                                                                                                                                                                                                                                  | 193 (27.9) | 197 (28.5) | 390 (28.2)  | 201 (29.0) | 100 (30.7) |
| <b>Time since first diagnosis of plaque-type psoriasis, years, mean±SD</b>                                                                                                                                                                                                                                                                                                                                                                                                                                              | 18.0±12.46 | 17.0±12.01 | 17.5±12.25  | 17.5±12.21 | 16.4±12.01 |
| <b>Previous biologic psoriasis therapy, n (%)</b>                                                                                                                                                                                                                                                                                                                                                                                                                                                                       | 161 (23.3) | 147 (21.3) | 308 (22.3)  | 148 (21.3) | 45 (13.8)  |
| <b>Previous systemic psoriasis therapy, n (%)</b>                                                                                                                                                                                                                                                                                                                                                                                                                                                                       | 449 (64.9) | 441 (63.8) | 890 (64.4)  | 422 (60.8) | 215 (66.0) |
| <sup>a</sup> Disease severity strata: moderate=PASI score 12–20 and IGA mod 2011 score 3/4 or PASI score ≥20 and IGA mod 2011 score 3 and BSA involvement of ≥10 %, and severe=PASI score ≥20 and IGA mod 2011 score 4 and BSA involvement of ≥10 %.<br>BSA, body surface area; ETN, etanercept; HD, high dose; IGA mod 2011, Investigator's Global Assessment modified 2011; LD, low dose; N, total number of patients; n, number of patients; PASI, Psoriasis Area and Severity Index; PBO, placebo; SEC, secukinumab |            |            |             |            |            |

**Table S2. Duration of exposure to study treatment by population (pediatric and adult): Up to Week 12 (Safety set)**

| Duration of exposure                                                                                                                                                                                                                                                         | Pediatric pool |                |                  |             |             | Adult pool          |                     |                   |              |
|------------------------------------------------------------------------------------------------------------------------------------------------------------------------------------------------------------------------------------------------------------------------------|----------------|----------------|------------------|-------------|-------------|---------------------|---------------------|-------------------|--------------|
|                                                                                                                                                                                                                                                                              | SEC LD<br>N=82 | SEC HD<br>N=82 | Any SEC<br>N=164 | PBO<br>N=41 | ETN<br>N=41 | SEC 150 mg<br>N=692 | SEC 300 mg<br>N=690 | Any SEC<br>N=1382 | ETN<br>N=323 |
| <b>Any, n (%)</b>                                                                                                                                                                                                                                                            | 82 (100.0)     | 82 (100.0)     | 164 (100.0)      | 41 (100.0)  | 41 (100.0)  | 692 (100.0)         | 690 (100.0)         | 1382 (100.0)      | 323 (100.0)  |
| <b>Exposure categories weeks, n (%)</b>                                                                                                                                                                                                                                      |                |                |                  |             |             |                     |                     |                   |              |
| ≥12 weeks                                                                                                                                                                                                                                                                    | 73 (89.0)      | 69 (84.1)      | 142 (86.6)       | 35 (85.4)   | 35 (85.4)   | 528 (76.3)          | 538 (78.0)          | 1066 (77.1)       | 253 (78.3)   |
| <b>Days</b>                                                                                                                                                                                                                                                                  |                |                |                  |             |             |                     |                     |                   |              |
| Mean±SD                                                                                                                                                                                                                                                                      | 84.4±9.45      | 83.9±9.25      | 84.1±9.33        | 84.6±15.97  | 86.3±8.78   | 82.8±9.82           | 83.3±8.46           | 83.1±9.16         | 82.6±9.45    |
| Median                                                                                                                                                                                                                                                                       | 84.0           | 84.0           | 84.0             | 84.0        | 84.0        | 84.0                | 84.0                | 84.0              | 84.0         |
| Min–Max                                                                                                                                                                                                                                                                      | 9–105          | 15–126         | 9–126            | 24–136      | 77–133      | 8–141               | 1–141               | 1–141             | 9–96         |
| Patient-time                                                                                                                                                                                                                                                                 | 19.0           | 18.8           | 37.8             | 9.5         | 9.7         | 156.9               | 157.5               | 314.4             | 73.0         |
| Patient-time in patient years is calculated as the sum of individual patient durations in days divided by 365.25<br>ETN, etanercept; LD, low dose; HD, high dose; N, total number of patients; n, number of patients; PBO, placebo; SD, standard deviation; SEC, secukinumab |                |                |                  |             |             |                     |                     |                   |              |

**Table S3. Duration of exposure to study treatment by population (pediatric and adult): Up to Week 52 (Safety set)**

| Duration of exposure                                                                                                                                                                                                                                           | Pediatric pool     |                     |                  |             | Adult pool                 |                            |                   |              |
|----------------------------------------------------------------------------------------------------------------------------------------------------------------------------------------------------------------------------------------------------------------|--------------------|---------------------|------------------|-------------|----------------------------|----------------------------|-------------------|--------------|
|                                                                                                                                                                                                                                                                | Any SEC LD<br>N=98 | Any SEC HD<br>N=100 | Any SEC<br>N=198 | ETN<br>N=41 | Any SEC<br>150 mg<br>N=999 | Any SEC<br>300 mg<br>N=990 | Any SEC<br>N=1989 | ETN<br>N=323 |
| Any exposure, n (%)                                                                                                                                                                                                                                            | 98 (100.0)         | 100 (100.0)         | 198 (100.0)      | 41 (100.0)  | 999 (100.0)                | 990 (100.0)                | 1989 (100.0)      | 323 (100.0)  |
| <b>Exposure categories weeks, n (%)</b>                                                                                                                                                                                                                        |                    |                     |                  |             |                            |                            |                   |              |
| ≥52 weeks                                                                                                                                                                                                                                                      | 73 (74.5)          | 58 (58.0)           | 131 (66.2)       | 30 (73.2)   | 471 (47.1)                 | 477 (48.2)                 | 948 (47.7)        | 223 (69.0)   |
| <b>Days</b>                                                                                                                                                                                                                                                    |                    |                     |                  |             |                            |                            |                   |              |
| Mean±SD                                                                                                                                                                                                                                                        | 345.0±53.86        | 336.1±69.05         | 340.5±62.00      | 338.2±72.64 | 319.4±70.42                | 323.1±69.26                | 321.3±69.85       | 335.3±83.29  |
| Median                                                                                                                                                                                                                                                         | 364.0              | 364.0               | 364.0            | 364.0       | 363.0                      | 363.0                      | 363.0             | 364.0        |
| Min–Max                                                                                                                                                                                                                                                        | 9–393              | 15–421              | 9–421            | 109–393     | 8–421                      | 1–407                      | 1–421             | 9–449        |
| Patient time                                                                                                                                                                                                                                                   | 92.6               | 92.0                | 184.6            | 38.0        | 873.7                      | 875.8                      | 1749.5            | 296.5        |
| Patient-time in patient years is calculated as the sum of individual patient durations in days divided by 365.25<br>ETN, etanercept; LD, low dose; HD, high dose; N, total number of patients; n, number of patients; SD, standard deviation; SEC, secukinumab |                    |                     |                  |             |                            |                            |                   |              |

## 1. Safety

### 1.1.1 Up to Week 12

The incidence of adverse events (AEs) in pediatric patients treated with secukinumab was generally comparable with the placebo group and with adult patients treated with secukinumab, and lower than in the etanercept group in the pediatric pool (**Table S4**). In the pediatric pool, the most affected system organ class (SOC) was “Infections and Infestations,” with similar incidences in the secukinumab treatment groups (low dose (LD): 31.7%; high dose (HD): 35.4%), which was lower than that in the placebo group (39.0%) and slightly higher than that in the etanercept group (26.8%). Similarly, in the adult pool, the most affected SOC was “Infections and Infestations” with a comparable incidence between the “Any secukinumab” group in adults (29.1%) and pediatric (33.5 %) patients (**Table S4**).

The most commonly reported preferred terms (PTs) were nasopharyngitis, pharyngitis, abdominal pain, Upper respiratory tract infection (URTI), and headache in the pediatric pool, and nasopharyngitis, diarrhea, oropharyngeal pain, URTI, and headache in adult pool. Nasopharyngitis was reported in 14.0% and 11.8% in the “Any secukinumab” groups, 9.8% and 11.5% in the etanercept groups, and 2.4% in the placebo group in the pediatric and adult pools, respectively (**Table S4**). In addition, URTIs were also analyzed by Customized MedDRA Query (CMQ). In the pediatric and adult populations, URTI (CMQ) was reported in 22.6% and 18.8% in the “Any secukinumab” groups, 19.5% and 15.8% in the etanercept groups, and 26.8% in the placebo group. AEs leading to discontinuation of study treatment in the “Any secukinumab” groups were similar in the pediatric (1.2%) and adult (1.3%) pools. In the etanercept groups, 2.4% in the pediatric pool and 1.9% in the adult pool had AEs leading to discontinuation of study treatment; it was 2.4% in the placebo group (**Table S4**). Overall, serious AEs (SAEs) were observed in 2 pediatric patients (1.2%) and 30 adult patients (2.2%) who received secukinumab, 4 pediatric patients (9.8%) and 3 adult patients (0.9%) receiving etanercept, and no patients in the placebo group (**Table S4**). SAEs are further described in **Table S5**.

**Table S4. Absolute and relative frequencies for TEAEs in pediatric and adult population: Up to Week 12 (Safety set)**

| n (%) 95% CI                                         | Pediatric population      |                           |                           |                           |                           | Adult population           |                            |                            |                            |
|------------------------------------------------------|---------------------------|---------------------------|---------------------------|---------------------------|---------------------------|----------------------------|----------------------------|----------------------------|----------------------------|
|                                                      | SEC LD<br>N=82            | SEC HD<br>N=82            | Any SEC<br>N=164          | PBO<br>N=41               | ETN<br>N=41               | SEC 150 mg<br>N=692        | SEC 300 mg<br>N=690        | Any SEC<br>N=1382          | ETN<br>N=323               |
| <b>Total AEs</b>                                     | 42 (51.2)<br>(40.0, 62.3) | 44 (53.7)<br>(42.4, 64.6) | 86 (52.4)<br>(44.5, 60.2) | 22 (53.7)<br>(37.6, 69.0) | 25 (61.0)<br>(44.5, 75.4) | 415 (60.0)<br>(56.2, 63.6) | 390 (56.5)<br>(52.7, 60.2) | 805 (58.2)<br>(55.6, 60.9) | 187 (57.9)<br>(52.3, 63.3) |
| <b>SAEs</b>                                          | 1 (1.2)<br>(0.1, 7.5)     | 1 (1.2)<br>(0.1, 7.5)     | 2 (1.2)<br>(0.2, 4.8)     | 0 (0.0)<br>(0.0, 10.7)    | 4 (9.8)<br>(3.2, 24.1)    | 15 (2.2)<br>(1.3, 3.6)     | 15 (2.2)<br>(1.3, 3.6)     | 30 (2.2)<br>(1.5, 3.1)     | 3 (0.9)<br>(0.2, 2.9)      |
| <b>Treatment discontinuation due to AEs</b>          | 0 (0.0)<br>(0.0, 5.6)     | 2 (2.4)<br>(0.4, 9.4)     | 2 (1.2)<br>(0.2, 4.8)     | 1 (2.4)<br>(0.1, 14.4)    | 1 (2.4)<br>(0.1, 14.4)    | 9 (1.3)<br>(0.6, 2.5)      | 9 (1.3)<br>(0.6, 2.6)      | 18 (1.3)<br>(0.8, 2.1)     | 6 (1.9)<br>(0.8, 4.2)      |
| <b>Most frequent AEs (by SOC)<sup>a</sup></b>        |                           |                           |                           |                           |                           |                            |                            |                            |                            |
| Infections and infestations                          | 26 (31.7)<br>(22.1, 43.0) | 29 (35.4)<br>(25.3, 46.8) | 55 (33.5)<br>(26.5, 41.4) | 16 (39.0)<br>(24.6, 55.5) | 11 (26.8)<br>(14.8, 43.2) | 205 (29.6)<br>(26.3, 33.2) | 197 (28.6)<br>(25.2, 32.1) | 402 (29.1)<br>(26.7, 31.6) | 80 (24.8)<br>(20.2, 29.9)  |
| Gastrointestinal disorders                           | 7 (8.5)<br>(3.8, 17.3)    | 12 (14.6)<br>(8.1, 24.6)  | 19 (11.6)<br>(7.3, 17.7)  | 7 (17.1)<br>(7.7, 32.6)   | 10 (24.4)<br>(12.9, 40.6) | 77 (11.1)<br>(8.9, 13.8)   | 88 (12.8)<br>(10.4, 15.5)  | 165 (11.9)<br>(10.3, 13.8) | 32 (9.9)<br>(7.0, 13.8)    |
| Skin and subcutaneous tissue disorders               | 8 (9.8)<br>(4.6, 18.8)    | 7 (8.5)<br>(3.8, 17.3)    | 15 (9.1)<br>(5.4, 14.9)   | 3 (7.3) (1.9, 21.0)       | 1 (2.4) (0.1, 14.4)       | 76 (11.0)<br>(8.8, 13.6)   | 80 (11.6)<br>(9.3, 14.3)   | 156 (11.3)<br>(9.7, 13.1)  | 35 (10.8)<br>(7.8, 14.9)   |
| General disorders and administration site conditions | 6 (7.3)<br>(3.0, 15.8)    | 7 (8.5)<br>(3.8, 17.3)    | 13 (7.9)<br>(4.5, 13.5)   | 3 (7.3)<br>(1.9, 21.0)    | 5 (12.2)<br>(4.6, 27.0)   | 48 (6.9)<br>(5.2, 9.2)     | 43 (6.2)<br>(4.6, 8.4)     | 91 (6.6)<br>(5.4, 8.1)     | 58 (18.0)<br>(14.0, 22.7)  |
| Respiratory, thoracic, and mediastinal disorders     | 3 (3.7)<br>(0.9, 11.1)    | 6 (7.3)<br>(3.0, 15.8)    | 9 (5.5)<br>(2.7, 10.5)    | 3 (7.3)<br>(1.9, 21.0)    | 1 (2.4)<br>(0.1, 14.4)    | 45 (6.5)<br>(4.8, 8.7)     | 54 (7.8)<br>(6.0, 10.2)    | 99 (7.2)<br>(5.9, 8.7)     | 16 (5.0)<br>(3.0, 8.1)     |
| <b>Most frequent AEs (by PT)<sup>a</sup></b>         |                           |                           |                           |                           |                           |                            |                            |                            |                            |
| Nasopharyngitis                                      | 13 (15.9)<br>(9.0, 26.0)  | 10 (12.2)<br>(6.3, 21.7)  | 23 (14.0)<br>(9.3, 20.5)  | 1 (2.4)<br>(0.1, 14.4)    | 4 (9.8)<br>(3.2, 24.1)    | 84 (12.1)<br>(9.8, 14.9)   | 79 (11.4)<br>(9.2, 14.1)   | 163 (11.8)<br>(10.2, 13.6) | 37 (11.5)<br>(8.3, 15.6)   |
| Pharyngitis                                          | 3 (3.7)<br>(0.9, 11.1)    | 3 (3.7)<br>(0.9, 11.1)    | 6 (3.7)<br>(1.5, 8.2)     | 4 (9.8)<br>(3.2, 24.1)    | 0 (0.0)<br>(0.0, 10.7)    | 7 (1.0)<br>(0.4, 2.2)      | 8 (1.2)<br>(0.5, 2.4)      | 15 (1.1)<br>(0.6, 1.8)     | 0 (0.0)<br>(0.0, 1.5)      |
| Abdominal pain                                       | 3 (3.7)<br>(0.9, 11.1)    | 2 (2.4)<br>(0.4, 9.4)     | 5 (3.0)<br>(1.1, 7.3)     | 0 (0.0)<br>(0.0, 10.7)    | 3 (7.3)<br>(1.9, 21.0)    | 4 (0.6)<br>(0.2, 1.6)      | 3 (0.4)<br>(0.1, 1.4)      | 7 (0.5)<br>(0.2, 1.1)      | 3 (0.9)<br>(0.2, 2.9)      |
| URTI                                                 | 2 (2.4)<br>(0.4, 9.4)     | 3 (3.7)<br>(0.9, 11.1)    | 5 (3.0)<br>(1.1, 7.3)     | 3 (7.3)<br>(1.9, 21.0)    | 1 (2.4)<br>(0.1, 14.4)    | 22 (3.2)<br>(2.1, 4.9)     | 17 (2.5)<br>(1.5, 4.0)     | 39 (2.8)<br>(2.0, 3.9)     | 7 (2.2)<br>(1.0, 4.6)      |
| Headache                                             | 2 (2.4)<br>(0.4, 9.4)     | 3 (3.7)<br>(0.9, 11.1)    | 5 (3.0)<br>(1.1, 7.3)     | 4 (9.8)<br>(3.2, 24.1)    | 1 (2.4)<br>(0.1, 14.4)    | 38 (5.5)<br>(4.0, 7.5)     | 45 (6.5)<br>(4.8, 8.7)     | 83 (6.0)<br>(4.8, 7.4)     | 23 (7.1)<br>(4.7, 10.6)    |

| <b>AEs of special interest</b>                                                                                                                                                                                                                                                                                                                                                                                                                                                                                                                                                                                                                                                                                                                                                                                                                                                                                                                                                                                                                                                                                                                                                                                       |                        |                       |                       |                        |                        |                        |                        |                        |                        |
|----------------------------------------------------------------------------------------------------------------------------------------------------------------------------------------------------------------------------------------------------------------------------------------------------------------------------------------------------------------------------------------------------------------------------------------------------------------------------------------------------------------------------------------------------------------------------------------------------------------------------------------------------------------------------------------------------------------------------------------------------------------------------------------------------------------------------------------------------------------------------------------------------------------------------------------------------------------------------------------------------------------------------------------------------------------------------------------------------------------------------------------------------------------------------------------------------------------------|------------------------|-----------------------|-----------------------|------------------------|------------------------|------------------------|------------------------|------------------------|------------------------|
| Hypersensitivity (SMQ) (narrow)                                                                                                                                                                                                                                                                                                                                                                                                                                                                                                                                                                                                                                                                                                                                                                                                                                                                                                                                                                                                                                                                                                                                                                                      | 3 (3.7)<br>(0.9, 11.1) | 2 (2.4)<br>(0.4, 9.4) | 5 (3.0)<br>(1.1, 7.3) | 1 (2.4)<br>(0.1, 14.4) | 2 (4.9)<br>(0.8, 17.8) | 31 (4.5)<br>(3.1, 6.4) | 32 (4.6)<br>(3.2, 6.6) | 63 (4.6)<br>(3.5, 5.8) | 17 (5.3)<br>(3.2, 8.5) |
| Neutropenia (NMQ) (narrow)                                                                                                                                                                                                                                                                                                                                                                                                                                                                                                                                                                                                                                                                                                                                                                                                                                                                                                                                                                                                                                                                                                                                                                                           | 3 (3.7)<br>(0.9, 11.1) | 2 (2.4)<br>(0.4, 9.4) | 5 (3.0)<br>(1.1, 7.3) | 0 (0.0)<br>(0.0, 10.7) | 0 (0.0)<br>(0.0, 10.7) | 2 (0.3)<br>(0.1, 1.2)  | 4 (0.6)<br>(0.2, 1.6)  | 6 (0.4)<br>(0.2, 1.0)  | 2 (0.6)<br>(0.1, 2.5)  |
| Neutropenia (PT)                                                                                                                                                                                                                                                                                                                                                                                                                                                                                                                                                                                                                                                                                                                                                                                                                                                                                                                                                                                                                                                                                                                                                                                                     | 2 (2.4)<br>(0.4, 9.4)  | 1 (1.2)<br>(0.1, 7.5) | 3 (1.8)<br>(0.5, 5.7) | 0 (0.0)<br>(0.0, 10.7) | 0 (0.0)<br>(0.0, 10.7) | 1 (0.1)<br>(0.0, 0.9)  | 2 (0.3)<br>(0.1, 1.2)  | 3 (0.2)<br>(0.1, 0.7)  | 2 (0.6)<br>(0.1, 2.5)  |
| IBD <sup>b</sup> (NMQ) (narrow)                                                                                                                                                                                                                                                                                                                                                                                                                                                                                                                                                                                                                                                                                                                                                                                                                                                                                                                                                                                                                                                                                                                                                                                      | 0 (0.0)<br>(0.0, 5.6)  | 0 (0.0)<br>(0.0, 5.6) | 0 (0.0)<br>(0.0, 2.9) | 0 (0.0)<br>(0.0, 10.7) | 0 (0.0)<br>(0.0, 10.7) | 1 (0.1)<br>(0.0, 0.9)  | 1 (0.1)<br>(0.0, 0.9)  | 2 (0.1)<br>(0.0, 0.6)  | 1 (0.3)<br>(0.0, 2.0)  |
| MACE (MI, Stroke, CV death) (NMQ)                                                                                                                                                                                                                                                                                                                                                                                                                                                                                                                                                                                                                                                                                                                                                                                                                                                                                                                                                                                                                                                                                                                                                                                    | 0 (0.0)<br>(0.0, 5.6)  | 0 (0.0)<br>(0.0, 5.6) | 0 (0.0)<br>(0.0, 2.9) | 0 (0.0)<br>(0.0, 10.7) | 0 (0.0)<br>(0.0, 10.7) | 1 (0.1)<br>(0.0, 0.9)  | 2 (0.3)<br>(0.1, 1.2)  | 3 (0.2)<br>(0.1, 0.7)  | 0 (0.0)<br>(0.0, 1.5)  |
| Malignant or unspecified tumors (SMQ)                                                                                                                                                                                                                                                                                                                                                                                                                                                                                                                                                                                                                                                                                                                                                                                                                                                                                                                                                                                                                                                                                                                                                                                | 0 (0.0)<br>(0.0, 5.6)  | 0 (0.0)<br>(0.0, 5.6) | 0 (0.0)<br>(0.0, 2.9) | 0 (0.0)<br>(0.0, 10.7) | 0 (0.0)<br>(0.0, 10.7) | 4 (0.6)<br>(0.2, 1.6)  | 1 (0.1)<br>(0.0, 0.9)  | 5 (0.4)<br>(0.1, 0.9)  | 0 (0.0)<br>(0.0, 1.5)  |
| <i>Candida</i> infections (HLT)                                                                                                                                                                                                                                                                                                                                                                                                                                                                                                                                                                                                                                                                                                                                                                                                                                                                                                                                                                                                                                                                                                                                                                                      | 0 (0.0)<br>(0.0, 5.6)  | 2 (2.4)<br>(0.4, 9.4) | 2 (1.2)<br>(0.2, 4.8) | 0 (0.0)<br>(0.0, 10.7) | 0 (0.0)<br>(0.0, 10.7) | 4 (0.6)<br>(0.2, 1.6)  | 8 (1.2)<br>(0.5, 2.4)  | 12 (0.9)<br>(0.5, 1.6) | 1 (0.3)<br>(0.0, 2.0)  |
| Nail <i>candida</i> (PT)                                                                                                                                                                                                                                                                                                                                                                                                                                                                                                                                                                                                                                                                                                                                                                                                                                                                                                                                                                                                                                                                                                                                                                                             | 0 (0.0)<br>(0.0, 5.6)  | 1 (1.2)<br>(0.1, 7.5) | 1 (0.6)<br>(0.0, 3.9) | 0 (0.0)<br>(0.0, 10.7) | 0 (0.0)<br>(0.0, 10.7) | 0 (0.0)<br>(0.0, 0.7)  | 0 (0.0)<br>(0.0, 0.7)  | 0 (0.0)<br>(0.0, 0.3)  | 0 (0.0)<br>(0.0, 1.5)  |
| Vulvovaginal <i>candidiasis</i> (PT)                                                                                                                                                                                                                                                                                                                                                                                                                                                                                                                                                                                                                                                                                                                                                                                                                                                                                                                                                                                                                                                                                                                                                                                 | 0 (0.0)<br>(0.0, 5.6)  | 1 (1.2)<br>(0.1, 7.5) | 1 (0.6)<br>(0.0, 3.9) | 0 (0.0)<br>(0.0, 10.7) | 0 (0.0)<br>(0.0, 10.7) | 2 (0.3)<br>(0.1, 1.2)  | 1 (0.1)<br>(0.0, 0.9)  | 3 (0.2)<br>(0.1, 0.7)  | 0 (0.0)<br>(0.0, 1.5)  |
| Suicide/self-injury (SMQ)                                                                                                                                                                                                                                                                                                                                                                                                                                                                                                                                                                                                                                                                                                                                                                                                                                                                                                                                                                                                                                                                                                                                                                                            | 0 (0.0)<br>(0.0, 5.6)  | 0 (0.0)<br>(0.0, 5.6) | 0 (0.0)<br>(0.0, 2.9) | 0 (0.0)<br>(0.0, 10.7) | 0 (0.0)<br>(0.0, 10.7) | 1 (0.1)<br>(0.0, 0.9)  | 0 (0.0)<br>(0.0, 0.7)  | 1 (0.1)<br>(0.0, 0.5)  | 0 (0.0)<br>(0.0, 1.5)  |
| Suicide attempt (PT)                                                                                                                                                                                                                                                                                                                                                                                                                                                                                                                                                                                                                                                                                                                                                                                                                                                                                                                                                                                                                                                                                                                                                                                                 | 0 (0.0)<br>(0.0, 5.6)  | 0 (0.0)<br>(0.0, 5.6) | 0 (0.0)<br>(0.0, 2.9) | 0 (0.0)<br>(0.0, 10.7) | 0 (0.0)<br>(0.0, 10.7) | 1 (0.1)<br>(0.0, 0.9)  | 0 (0.0)<br>(0.0, 0.7)  | 1 (0.1)<br>(0.0, 0.5)  | 0 (0.0)<br>(0.0, 1.5)  |
| ISRs <sup>c</sup>                                                                                                                                                                                                                                                                                                                                                                                                                                                                                                                                                                                                                                                                                                                                                                                                                                                                                                                                                                                                                                                                                                                                                                                                    | 3 (3.7) (0.9, 11.1)    | 1 (1.2) (0.1, 7.5)    | 4 (2.4) (0.8, 6.5)    | 2 (4.9) (0.8, 17.8)    | 3 (7.3) (1.9, 21.0)    | 4 (0.6) (0.2, 1.6)     | 6 (0.9) (0.4, 2.0)     | 10 (0.7) (0.4, 1.4)    | 33 (10.2) (7.2, 14.2)  |
| <p><sup>a</sup>“Any SEC” for both the treatment groups (LD and HD) includes all patients treated with SEC from the start of the study</p> <p><sup>b</sup>AEs ordered according to the incidence in Any secukinumab group in pediatric population; <sup>b</sup>One patient reported a mild AE of hemorrhagic diarrhea which was resolved and confirmed not to be an IBD; <sup>c</sup>ISRs corresponding to event coded with HLT ‘Injection-site reaction’ and some with HLT ‘Administration-site reaction’ or ‘Application- and instillation-site reactions’</p> <p>AE, adverse event; CI, confidence interval; CV, cardiovascular; ETN, etanercept; HD, high dose; HLT, high level term; IBD, inflammatory bowel disease; ISR, injection-site reaction; LD, low dose; LLN, lower limit of normal; MACE, major adverse cardiovascular event; MedDRA version 23.0, Medical Dictionary for Regulatory Activities; MI, myocardial infarction; N, total number of patients; NMQ, Novartis customized MedDRA Query; PBO, placebo; PT, preferred term; SAE, serious AE; SMQ, Standardized MedDRA Query; SEC, secukinumab; SOC, system organ class; TEAE, treatment-emergent AE; URTI, upper respiratory tract infection</p> |                        |                       |                       |                        |                        |                        |                        |                        |                        |

**Table S5. Absolute and relative frequencies for treatment-emergent SAEs by PT and population (pediatric and adult): Up to Week 12 (Safety set)**

| PT, n (%) 95% CI                                                                                                                                                                                                                                                                                                                                                                                                                                                          | Pediatric pool        |                       |                       |                        |                        | Adult pool                 |                            |                        |                       |
|---------------------------------------------------------------------------------------------------------------------------------------------------------------------------------------------------------------------------------------------------------------------------------------------------------------------------------------------------------------------------------------------------------------------------------------------------------------------------|-----------------------|-----------------------|-----------------------|------------------------|------------------------|----------------------------|----------------------------|------------------------|-----------------------|
|                                                                                                                                                                                                                                                                                                                                                                                                                                                                           | Any SEC<br>LD<br>N=82 | Any SEC<br>HD<br>N=82 | Any SEC<br>N=164      | PBO<br>N=41            | ETN<br>N=41            | Any SEC<br>150 mg<br>N=692 | Any SEC<br>300 mg<br>N=690 | Any SEC<br>N=1382      | ETN<br>N=323          |
| Any PT, Total                                                                                                                                                                                                                                                                                                                                                                                                                                                             | 1 (1.2)<br>(0.1, 7.5) | 1 (1.2)<br>(0.1, 7.5) | 2 (1.2) (0.2,<br>4.8) | 0 (0.0)<br>(0.0, 10.7) | 4 (9.8)<br>(3.2, 24.1) | 15 (2.2)<br>(1.3, 3.6)     | 15 (2.2)<br>(1.3, 3.6)     | 30 (2.2)<br>(1.5, 3.1) | 3 (0.9)<br>(0.2, 2.9) |
| Alanine<br>aminotransferase<br>increased                                                                                                                                                                                                                                                                                                                                                                                                                                  | 1 (1.2) (0.1,<br>7.5) | 0 (0.0)<br>(0.0, 5.6) | 1 (0.6) (0.0,<br>3.9) | 0 (0.0)<br>(0.0, 10.7) | 0 (0.0)<br>(0.0, 10.7) | 0 (0.0)<br>(0.0, 0.7)      | 0 (0.0)<br>(0.0, 0.7)      | 0 (0.0)<br>(0.0, 0.3)  | 0 (0.0)<br>(0.0, 1.5) |
| Toxic shock<br>syndrome                                                                                                                                                                                                                                                                                                                                                                                                                                                   | 0 (0.0)<br>(0.0, 5.6) | 1 (1.2)<br>(0.1, 7.5) | 1 (0.6) (0.0,<br>3.9) | 0 (0.0)<br>(0.0, 10.7) | 0 (0.0)<br>(0.0, 10.7) | 0 (0.0)<br>(0.0, 0.7)      | 0 (0.0)<br>(0.0, 0.7)      | 0 (0.0)<br>(0.0, 0.3)  | 0 (0.0)<br>(0.0, 1.5) |
| PTs are sorted in descending order of frequency in the "Any SEC" column for the pediatric pool<br>Only SAEs which occurred in the secukinumab-treated pediatric population, and the corresponding SAEs in other treatment groups and adults are presented<br>CI, confidence interval; ETN, etanercept; HD, high dose; LD, low dose; N, total number of patients; n, number of patients; PBO, placebo; PT, preferred term; SAE, serious adverse event;<br>SEC, secukinumab |                       |                       |                       |                        |                        |                            |                            |                        |                       |



**Table S6. EAIRs for treatment-emergent SAEs by preferred term and population (pediatric and adult): Up to Week 52 (Safety set)**

| PT, EAIR/100 patient-years (95% CI) | Pediatric pool     |                     |                    |                     | Adult pool                 |                            |                   |                    |
|-------------------------------------|--------------------|---------------------|--------------------|---------------------|----------------------------|----------------------------|-------------------|--------------------|
|                                     | Any SEC LD<br>N=98 | Any SEC HD<br>N=100 | Any SEC<br>N=198   | ETN<br>N=41         | Any SEC<br>150 mg<br>N=999 | Any SEC<br>300 mg<br>N=990 | Any SEC<br>N=1989 | ETN<br>N=323       |
| Any PT, Total                       | 7.8<br>(3.1, 16.1) | 6.7<br>(2.5, 14.6)  | 7.3<br>(3.9, 12.4) | 14.5<br>(4.7, 33.9) | 7.5<br>(5.8, 9.6)          | 7.5<br>(5.8, 9.6)          | 7.5<br>(6.3, 9.0) | 6.9<br>(4.2, 10.7) |
| Alanine aminotransferase increased  | 1.1<br>(0.0, 6.1)  | 0.0<br>(0.0, 4.0)   | 0.5<br>(0.0, 3.0)  | 0.0<br>(0.0, 9.7)   | 0.0<br>(0.0, 0.4)          | 0.0<br>(0.0, 0.4)          | 0.0<br>(0.0, 0.2) | 0.0<br>(0.0, 1.2)  |
| Appendicitis                        | 0.0<br>(0.0, 4.0)  | 1.1<br>(0.0, 6.1)   | 0.5<br>(0.0, 3.0)  | 0.0<br>(0.0, 9.7)   | 0.0<br>(0.0, 0.4)          | 0.1<br>(0.0, 0.6)          | 0.1<br>(0.0, 0.3) | 0.0<br>(0.0, 1.2)  |
| Arthritis reactive                  | 1.1<br>(0.0, 6.0)  | 0.0<br>(0.0, 4.0)   | 0.5<br>(0.0, 3.0)  | 0.0<br>(0.0, 9.7)   | 0.0<br>(0.0, 0.4)          | 0.0<br>(0.0, 0.4)          | 0.0<br>(0.0, 0.2) | 0.0<br>(0.0, 1.2)  |
| Bronchitis                          | 1.1<br>(0.0, 6.1)  | 0.0<br>(0.0, 4.0)   | 0.5<br>(0.0, 3.0)  | 0.0<br>(0.0, 9.7)   | 0.0<br>(0.0, 0.4)          | 0.0<br>(0.0, 0.4)          | 0.0<br>(0.0, 0.2) | 0.0<br>(0.0, 1.2)  |
| Clavicle fracture                   | 0.0<br>(0.0, 4.0)  | 1.1<br>(0.0, 6.1)   | 0.5<br>(0.0, 3.0)  | 0.0<br>(0.0, 9.7)   | 0.0<br>(0.0, 0.4)          | 0.1<br>(0.0, 0.6)          | 0.1<br>(0.0, 0.3) | 0.3<br>(0.0, 1.9)  |
| Enterocolitis bacterial             | 0.0<br>(0.0, 4.0)  | 1.1<br>(0.0, 6.1)   | 0.5<br>(0.0, 3.0)  | 0.0<br>(0.0, 9.7)   | 0.0<br>(0.0, 0.4)          | 0.0<br>(0.0, 0.4)          | 0.0<br>(0.0, 0.2) | 0.0<br>(0.0, 1.2)  |
| Infectious mononucleosis            | 1.1<br>(0.0, 6.1)  | 0.0<br>(0.0, 4.0)   | 0.5<br>(0.0, 3.0)  | 0.0<br>(0.0, 9.7)   | 0.0<br>(0.0, 0.4)          | 0.0<br>(0.0, 0.4)          | 0.0<br>(0.0, 0.2) | 0.0<br>(0.0, 1.2)  |
| Infectious pleural effusion         | 0.0<br>(0.0, 4.0)  | 1.1<br>(0.0, 6.1)   | 0.5<br>(0.0, 3.0)  | 0.0<br>(0.0, 9.7)   | 0.0<br>(0.0, 0.4)          | 0.0<br>(0.0, 0.4)          | 0.0<br>(0.0, 0.2) | 0.0<br>(0.0, 1.2)  |
| Intentional self-injury             | 1.1<br>(0.0, 6.0)  | 0.0<br>(0.0, 4.0)   | 0.5<br>(0.0, 3.0)  | 0.0<br>(0.0, 9.7)   | 0.0<br>(0.0, 0.4)          | 0.0<br>(0.0, 0.4)          | 0.0<br>(0.0, 0.2) | 0.0<br>(0.0, 1.2)  |
| Lung abscess                        | 0.0<br>(0.0, 4.0)  | 1.1<br>(0.0, 6.1)   | 0.5<br>(0.0, 3.0)  | 0.0<br>(0.0, 9.7)   | 0.0<br>(0.0, 0.4)          | 0.0<br>(0.0, 0.4)          | 0.0<br>(0.0, 0.2) | 0.0<br>(0.0, 1.2)  |
| Lymphadenopathy                     | 0.0<br>(0.0, 4.0)  | 1.1<br>(0.0, 6.1)   | 0.5<br>(0.0, 3.0)  | 0.0<br>(0.0, 9.7)   | 0.1<br>(0.0, 0.6)          | 0.0<br>(0.0, 0.4)          | 0.1<br>(0.0, 0.3) | 0.0<br>(0.0, 1.2)  |
| Major depression                    | 1.1<br>(0.0, 6.0)  | 0.0<br>(0.0, 4.0)   | 0.5<br>(0.0, 3.0)  | 0.0<br>(0.0, 9.7)   | 0.0<br>(0.0, 0.4)          | 0.0<br>(0.0, 0.4)          | 0.0<br>(0.0, 0.2) | 0.0<br>(0.0, 1.2)  |
| Pneumonia                           | 0.0<br>(0.0, 4.0)  | 1.1<br>(0.0, 6.1)   | 0.5<br>(0.0, 3.0)  | 0.0<br>(0.0, 9.7)   | 0.2<br>(0.0, 0.8)          | 0.2<br>(0.0, 0.8)          | 0.2<br>(0.1, 0.6) | 0.0<br>(0.0, 1.2)  |
| Suicidal ideation                   | 1.1<br>(0.0, 6.0)  | 0.0<br>(0.0, 4.0)   | 0.5<br>(0.0, 3.0)  | 0.0<br>(0.0, 9.7)   | 0.0<br>(0.0, 0.4)          | 0.0<br>(0.0, 0.4)          | 0.0<br>(0.0, 0.2) | 0.0<br>(0.0, 1.2)  |
| Testicular torsion                  | 1.1<br>(0.0, 6.0)  | 0.0<br>(0.0, 4.0)   | 0.5<br>(0.0, 3.0)  | 0.0<br>(0.0, 9.7)   | 0.0<br>(0.0, 0.4)          | 0.0<br>(0.0, 0.4)          | 0.0<br>(0.0, 0.2) | 0.0<br>(0.0, 1.2)  |

|                                                                                                                                                                                                                                                                                                                                                                                                                                                                                                                                 |                   |                   |                   |                   |                   |                   |                   |                   |
|---------------------------------------------------------------------------------------------------------------------------------------------------------------------------------------------------------------------------------------------------------------------------------------------------------------------------------------------------------------------------------------------------------------------------------------------------------------------------------------------------------------------------------|-------------------|-------------------|-------------------|-------------------|-------------------|-------------------|-------------------|-------------------|
| Thrombophlebitis                                                                                                                                                                                                                                                                                                                                                                                                                                                                                                                | 0.0<br>(0.0, 4.0) | 1.1<br>(0.0, 6.1) | 0.5<br>(0.0, 3.0) | 0.0<br>(0.0, 9.7) | 0.0<br>(0.0, 0.4) | 0.0<br>(0.0, 0.4) | 0.0<br>(0.0, 0.2) | 0.0<br>(0.0, 1.2) |
| Toxic shock syndrome                                                                                                                                                                                                                                                                                                                                                                                                                                                                                                            | 0.0<br>(0.0, 4.0) | 1.1<br>(0.0, 6.1) | 0.5<br>(0.0, 3.0) | 0.0<br>(0.0, 9.7) | 0.0<br>(0.0, 0.4) | 0.0<br>(0.0, 0.4) | 0.0<br>(0.0, 0.2) | 0.0<br>(0.0, 1.2) |
| Venous thrombosis limb                                                                                                                                                                                                                                                                                                                                                                                                                                                                                                          | 0.0<br>(0.0, 4.0) | 1.1<br>(0.0, 6.1) | 0.5<br>(0.0, 3.0) | 0.0<br>(0.0, 9.7) | 0.0<br>(0.0, 0.4) | 0.0<br>(0.0, 0.4) | 0.0<br>(0.0, 0.2) | 0.0<br>(0.0, 1.2) |
| <p>PTs are sorted in descending order of IR in the “Any SEC” column for the pediatric pool. Only SAEs which occurred in the secukinumab-treated pediatric population and the corresponding SAEs in other treatment groups and adults are presented</p> <p>CI, confidence interval; EAIR, exposure-adjusted IR per 100 patient-years; ETN, etanercept; HD, high dose; IR, incidence rate; LD, low dose; N, total number of patients; n, number of patients; PT, preferred term; SAE, serious adverse event; SEC, secukinumab</p> |                   |                   |                   |                   |                   |                   |                   |                   |

## 1 Subgroup analysis

### 1.1. Up to Week 12

#### 1.1.1. By Age

In the <12-year subgroup, the incidence of AEs (44%) was lower with “Any secukinumab” than with etanercept (70%) and was similar to the placebo group (40%). The incidence of AEs with “Any secukinumab” was higher in the ≥12-years-subgroup (56.1%). The most frequently affected SOCs were gastrointestinal disorders, blood and lymphatic system disorders, general disorders, and administration-site conditions and injury, poisoning, and procedural complications in the <12-year group compared with gastrointestinal disorders, skin and subcutaneous tissue disorders, general disorders and administration-site conditions, and respiratory, thoracic, and mediastinal disorders in the ≥12-year group (**Table S7[i] & [ii]**). Nasopharyngitis, the most commonly reported AE (by PT), was less frequent in patients aged <12 years compared with those aged ≥12 years (6.0% vs 17.5%) in patients treated with “Any secukinumab” dose. The incidence of nasopharyngitis in both subgroups on etanercept was 10.0% and 9.7%, respectively. In the placebo group, 10.0% of patients experienced nasopharyngitis in the <12-year subgroup compared with none in the ≥12-year subgroup (**Table S7 [i] & [ii]**). Abdominal pain (8%) and nasopharyngitis (17.5%) were the most commonly reported AE (by PT) in the <12-year and ≥12-year group, respectively, and were 8% and 17.5% for patients with “Any secukinumab” (**Table S7 [i] & [ii]**). Neutropenia (Novartis customized MedDRA Query [NMQ]) was observed in 4.0% of patients in the <12-year age group and 2.6% in the ≥12-year groups of the pediatric population who received “Any secukinumab” (**Table S7 [i] & [ii]**).

**Table S7. Absolute and relative frequencies for treatment-emergent AEs in pediatric population by age**

**strata: Up to Week 12 (Safety set)**

**(i) Age group: <12 years**

| <b>Age group: &lt;12 years</b>                                                                                                                                                                                                                                                                                                                                                                                                                                                                                                                                                             |                           |                           |                           |                          |                          |
|--------------------------------------------------------------------------------------------------------------------------------------------------------------------------------------------------------------------------------------------------------------------------------------------------------------------------------------------------------------------------------------------------------------------------------------------------------------------------------------------------------------------------------------------------------------------------------------------|---------------------------|---------------------------|---------------------------|--------------------------|--------------------------|
| <b>n (%) 95% CI</b>                                                                                                                                                                                                                                                                                                                                                                                                                                                                                                                                                                        | <b>SEC LD<br/>N=25</b>    | <b>SEC HD<br/>N=25</b>    | <b>Any SEC<br/>N=50</b>   | <b>PBO<br/>N=10</b>      | <b>ETN<br/>N=10</b>      |
| <b>Total AEs</b>                                                                                                                                                                                                                                                                                                                                                                                                                                                                                                                                                                           | 10 (40.0)<br>(21.8, 61.1) | 12 (48.0)<br>(28.3, 68.2) | 22 (44.0)<br>(30.3, 58.7) | 4 (40.0)<br>(13.7, 72.6) | 7 (70.0)<br>(35.4, 91.9) |
| <b>SAEs</b>                                                                                                                                                                                                                                                                                                                                                                                                                                                                                                                                                                                | 0 (0.0)<br>(0.0, 16.6)    | 1 (4.0)<br>(0.2, 22.3)    | 1 (2.0)<br>(0.1, 12.0)    | 0 (0.0)<br>(0.0, 34.5)   | 1 (10.0)<br>(0.5, 45.9)  |
| <b>Treatment discontinuation due to AEs</b>                                                                                                                                                                                                                                                                                                                                                                                                                                                                                                                                                | 0 (0.0)<br>(0.0, 16.6)    | 2 (8.0)<br>(1.4, 27.5)    | 2 (4.0)<br>(0.7, 14.9)    | 0 (0.0)<br>(0.0, 34.5)   | 0 (0.0)<br>(0.0, 34.5)   |
| <b>Top five most frequent AEs (by SOC)<sup>a</sup></b>                                                                                                                                                                                                                                                                                                                                                                                                                                                                                                                                     |                           |                           |                           |                          |                          |
| Infections and infestations                                                                                                                                                                                                                                                                                                                                                                                                                                                                                                                                                                | 6 (24.0)<br>(10.2, 45.5)  | 9 (36.0)<br>(18.7, 57.4)  | 15 (30.0)<br>(18.3, 44.8) | 2 (20.0)<br>(3.5, 55.8)  | 3 (30.0)<br>(8.1, 64.6)  |
| Gastrointestinal disorders                                                                                                                                                                                                                                                                                                                                                                                                                                                                                                                                                                 | 3 (12.0)<br>(3.2, 32.3)   | 4 (16.0)<br>(5.3, 36.9)   | 7 (14.0)<br>(6.3, 27.4)   | 0 (0.0)<br>(0.0, 34.5)   | 2 (20.0)<br>(3.5, 55.8)  |
| Blood and lymphatic system disorders                                                                                                                                                                                                                                                                                                                                                                                                                                                                                                                                                       | 1 (4.0)<br>(0.2, 22.3)    | 2 (8.0)<br>(1.4, 27.5)    | 3 (6.0)<br>(1.6, 17.5)    | 1 (10.0)<br>(0.5, 45.9)  | 0 (0.0)<br>(0.0, 34.5)   |
| General disorders and administration-site conditions                                                                                                                                                                                                                                                                                                                                                                                                                                                                                                                                       | 3 (12.0)<br>(3.2, 32.3)   | 0 (0.0)<br>(0.0, 16.6)    | 3 (6.0)<br>(1.6, 17.5)    | 0 (0.0)<br>(0.0, 34.5)   | 2 (20.0)<br>(3.5, 55.8)  |
| Injury, poisoning, and procedural complications                                                                                                                                                                                                                                                                                                                                                                                                                                                                                                                                            | 2 (8.0)<br>(1.4, 27.5)    | 1 (4.0)<br>(0.2, 22.3)    | 3 (6.0)<br>(1.6, 17.5)    | 0 (0.0)<br>(0.0, 34.5)   | 0 (0.0)<br>(0.0, 34.5)   |
| <b>Top five most frequent AEs (by PT)<sup>a</sup></b>                                                                                                                                                                                                                                                                                                                                                                                                                                                                                                                                      |                           |                           |                           |                          |                          |
| Abdominal pain                                                                                                                                                                                                                                                                                                                                                                                                                                                                                                                                                                             | 2 (8.0)<br>(1.4, 27.5)    | 2 (8.0)<br>(1.4, 27.5)    | 4 (8.0)<br>(2.6, 20.1)    | 0 (0.0)<br>(0.0, 34.5)   | 1 (10.0)<br>(0.5, 45.9)  |
| Nasopharyngitis                                                                                                                                                                                                                                                                                                                                                                                                                                                                                                                                                                            | 2 (8.0)<br>(1.4, 27.5)    | 1 (4.0)<br>(0.2, 22.3)    | 3 (6.0)<br>(1.6, 17.5)    | 1 (10.0)<br>(0.5, 45.9)  | 1 (10.0)<br>(0.5, 45.9)  |
| Arthropod bite                                                                                                                                                                                                                                                                                                                                                                                                                                                                                                                                                                             | 1 (4.0)<br>(0.2, 22.3)    | 1 (4.0)<br>(0.2, 22.3)    | 2 (4.0)<br>(0.7, 14.9)    | 0 (0.0)<br>(0.0, 34.5)   | 0 (0.0)<br>(0.0, 34.5)   |
| Diarrhea                                                                                                                                                                                                                                                                                                                                                                                                                                                                                                                                                                                   | 1 (4.0)<br>(0.2, 22.3)    | 1 (4.0)<br>(0.2, 22.3)    | 2 (4.0)<br>(0.7, 14.9)    | 0 (0.0)<br>(0.0, 34.5)   | 0 (0.0)<br>(0.0, 34.5)   |
| Leukopenia                                                                                                                                                                                                                                                                                                                                                                                                                                                                                                                                                                                 | 1 (4.0)<br>(0.2, 22.3)    | 1 (4.0)<br>(0.2, 22.3)    | 2 (4.0)<br>(0.7, 14.9)    | 0 (0.0)<br>(0.0, 34.5)   | 0 (0.0)<br>(0.0, 34.5)   |
| <b>AEs of special interest</b>                                                                                                                                                                                                                                                                                                                                                                                                                                                                                                                                                             |                           |                           |                           |                          |                          |
| Infections and infestations (SOC)                                                                                                                                                                                                                                                                                                                                                                                                                                                                                                                                                          | 6 (24.0)<br>(10.2, 45.5)  | 9 (36.0)<br>(18.7, 57.4)  | 15 (30.0)<br>(18.3, 44.8) | 2 (20.0)<br>(3.5, 55.8)  | 3 (30.0)<br>(8.1, 64.6)  |
| Neutropenia (NMQ) (narrow)                                                                                                                                                                                                                                                                                                                                                                                                                                                                                                                                                                 | 1 (4.0)<br>(0.2, 22.3)    | 1 (4.0)<br>(0.2, 22.3)    | 2 (4.0)<br>(0.7, 14.9)    | 0 (0.0)<br>(0.0, 34.5)   | 0 (0.0)<br>(0.0, 34.5)   |
| Hypersensitivity (SMQ) (narrow)                                                                                                                                                                                                                                                                                                                                                                                                                                                                                                                                                            | 0 (0.0)<br>(0.0, 16.6)    | 0 (0.0)<br>(0.0, 16.6)    | 0 (0.0)<br>(0.0, 8.9)     | 1 (10.0)<br>(0.5, 45.9)  | 2 (20.0)<br>(3.5, 55.8)  |
| ISRs                                                                                                                                                                                                                                                                                                                                                                                                                                                                                                                                                                                       | 1 (4.0)<br>(0.2, 22.3)    | 0 (0.0)<br>(0.0, 16.6)    | 1 (2.0)<br>(0.1, 12.0)    | 0 (0.0)<br>(0.0, 34.5)   | 1 (10.0)<br>(0.5, 45.9)  |
| <p><sup>a</sup>“Any SEC” for both the treatment groups (LD and HD) includes all patients treated with SEC from the start of the study and those who switched from PBO to SEC at Week 12</p> <p><sup>a</sup>AEs ordered according to pediatric population</p> <p>AE, adverse event; ETN, etanercept; HD, high dose; ISR, injection-site reaction; LD, low dose; N, total number of patients; n, number of patients; NMQ, Novartis customized MedDRA Query; PBO, placebo; PT, preferred term; SAE, serious AE; SEC, secukinumab; SMQ, standardized MedDRA Query; SOC, system organ class</p> |                           |                           |                           |                          |                          |

(ii) Age group: ≥12 years

| <b>Age group: ≥12 years</b>                                                                                                                                                                                                                                                                                                                                                                                                                                                                                                                                                                                                            |                           |                           |                           |                           |                           |
|----------------------------------------------------------------------------------------------------------------------------------------------------------------------------------------------------------------------------------------------------------------------------------------------------------------------------------------------------------------------------------------------------------------------------------------------------------------------------------------------------------------------------------------------------------------------------------------------------------------------------------------|---------------------------|---------------------------|---------------------------|---------------------------|---------------------------|
| <b>n (%) 95% CI</b>                                                                                                                                                                                                                                                                                                                                                                                                                                                                                                                                                                                                                    | <b>SEC LD<br/>N=57</b>    | <b>SEC HD<br/>N=57</b>    | <b>Any SEC<br/>N=114</b>  | <b>PBO<br/>N=31</b>       | <b>ETN<br/>N=31</b>       |
| <b>Total AEs</b>                                                                                                                                                                                                                                                                                                                                                                                                                                                                                                                                                                                                                       | 32 (56.1)<br>(42.4, 69.0) | 32 (56.1)<br>(42.4, 69.0) | 64 (56.1)<br>(46.5, 65.3) | 18 (58.1)<br>(39.3, 74.9) | 18 (58.1)<br>(39.3, 74.9) |
| <b>SAEs</b>                                                                                                                                                                                                                                                                                                                                                                                                                                                                                                                                                                                                                            | 1 (1.8)<br>(0.1, 10.6)    | 0 (0.0)<br>(0.0, 7.9)     | 1 (0.9)<br>(0.0, 5.5)     | 0 (0.0)<br>(0.0, 13.7)    | 3 (9.7)<br>(2.5, 26.9)    |
| <b>Treatment discontinuation due to AEs</b>                                                                                                                                                                                                                                                                                                                                                                                                                                                                                                                                                                                            | 0 (0.0)<br>(0.0, 7.9)     | 0 (0.0)<br>(0.0, 7.9)     | 0 (0.0)<br>(0.0, 4.1)     | 1 (3.2)<br>(0.2, 18.5)    | 1 (3.2)<br>(0.2, 18.5)    |
| <b>Top five most frequent AEs (by SOC)<sup>a</sup></b>                                                                                                                                                                                                                                                                                                                                                                                                                                                                                                                                                                                 |                           |                           |                           |                           |                           |
| Infections and infestations                                                                                                                                                                                                                                                                                                                                                                                                                                                                                                                                                                                                            | 20 (35.1)<br>(23.2, 48.9) | 20 (35.1)<br>(23.2, 48.9) | 40 (35.1)<br>(26.5, 44.7) | 14 (45.2)<br>(27.8, 63.7) | 8 (25.8)<br>(12.5, 44.9)  |
| Gastrointestinal disorders                                                                                                                                                                                                                                                                                                                                                                                                                                                                                                                                                                                                             | 4 (7.0)<br>(2.3, 17.8)    | 8 (14.0)<br>(6.7, 26.3)   | 12 (10.5)<br>(5.8, 18.0)  | 7 (22.6)<br>(10.3, 41.5)  | 8 (25.8)<br>(12.5, 44.9)  |
| Skin and subcutaneous tissue disorders                                                                                                                                                                                                                                                                                                                                                                                                                                                                                                                                                                                                 | 6 (10.5)<br>(4.4, 22.2)   | 6 (10.5)<br>(4.4, 22.2)   | 12 (10.5)<br>(5.8, 18.0)  | 3 (9.7)<br>(2.5, 26.9)    | 1 (3.2)<br>(0.2, 18.5)    |
| General disorders and administration-site conditions                                                                                                                                                                                                                                                                                                                                                                                                                                                                                                                                                                                   | 3 (5.3)<br>(1.4, 15.5)    | 7 (12.3)<br>(5.5, 24.3)   | 10 (8.8)<br>(4.5, 15.9)   | 3 (9.7)<br>(2.5, 26.9)    | 3 (9.7)<br>(2.5, 26.9)    |
| Respiratory, thoracic, and mediastinal disorders                                                                                                                                                                                                                                                                                                                                                                                                                                                                                                                                                                                       | 3 (5.3)<br>(1.4, 15.5)    | 4 (7.0)<br>(2.3, 17.8)    | 7 (6.1)<br>(2.7, 12.7)    | 2 (6.5)<br>(1.1, 22.8)    | 1 (3.2)<br>(0.2, 18.5)    |
| <b>Top five most frequent AEs (by PT)<sup>a</sup></b>                                                                                                                                                                                                                                                                                                                                                                                                                                                                                                                                                                                  |                           |                           |                           |                           |                           |
| Nasopharyngitis                                                                                                                                                                                                                                                                                                                                                                                                                                                                                                                                                                                                                        | 11 (19.3)<br>(10.5, 32.3) | 9 (15.8)<br>(7.9, 28.4)   | 20 (17.5)<br>(11.3, 26.0) | 0 (0.0)<br>(0.0, 13.7)    | 3 (9.7)<br>(2.5, 26.9)    |
| Headache                                                                                                                                                                                                                                                                                                                                                                                                                                                                                                                                                                                                                               | 2 (3.5)<br>(0.6, 13.2)    | 3 (5.3)<br>(1.4, 15.5)    | 5 (4.4)<br>(1.6, 10.4)    | 4 (12.9)<br>(4.2, 30.8)   | 1 (3.2)<br>(0.2, 18.5)    |
| Dysmenorrhea                                                                                                                                                                                                                                                                                                                                                                                                                                                                                                                                                                                                                           | 2 (3.5)<br>(0.6, 13.2)    | 2 (3.5)<br>(0.6, 13.2)    | 4 (3.5)<br>(1.1, 9.3)     | 0 (0.0)<br>(0.0, 13.7)    | 1 (3.2)<br>(0.2, 18.5)    |
| Pharyngitis                                                                                                                                                                                                                                                                                                                                                                                                                                                                                                                                                                                                                            | 2 (3.5)<br>(0.6, 13.2)    | 2 (3.5)<br>(0.6, 13.2)    | 4 (3.5)<br>(1.1, 9.3)     | 4 (12.9)<br>(4.2, 30.8)   | 0 (0.0)<br>(0.0, 13.7)    |
| Abdominal pain upper                                                                                                                                                                                                                                                                                                                                                                                                                                                                                                                                                                                                                   | 0 (0.0)<br>(0.0, 7.9)     | 3 (5.3)<br>(1.4, 15.5)    | 3 (2.6)<br>(0.7, 8.1)     | 2 (6.5)<br>(1.1, 22.8)    | 2 (6.5)<br>(1.1, 22.8)    |
| <b>AEs of special interest</b>                                                                                                                                                                                                                                                                                                                                                                                                                                                                                                                                                                                                         |                           |                           |                           |                           |                           |
| Infections and infestations (SOC)                                                                                                                                                                                                                                                                                                                                                                                                                                                                                                                                                                                                      | 20 (35.1)<br>(23.2, 48.9) | 20 (35.1)<br>(23.2, 48.9) | 40 (35.1)<br>(26.5, 44.7) | 14 (45.2)<br>(27.8, 63.7) | 8 (25.8)<br>(12.5, 44.9)  |
| Hypersensitivity (SMQ) (narrow)                                                                                                                                                                                                                                                                                                                                                                                                                                                                                                                                                                                                        | 3 (5.3)<br>(1.4, 15.5)    | 2 (3.5)<br>(0.6, 13.2)    | 5 (4.4)<br>(1.6, 10.4)    | 0 (0.0)<br>(0.0, 13.7)    | 0 (0.0)<br>(0.0, 13.7)    |
| Neutropenia (NMQ) (narrow)                                                                                                                                                                                                                                                                                                                                                                                                                                                                                                                                                                                                             | 2 (3.5)<br>(0.6, 13.2)    | 1 (1.8)<br>(0.1, 10.6)    | 3 (2.6)<br>(0.7, 8.1)     | 0 (0.0)<br>(0.0, 13.7)    | 0 (0.0)<br>(0.0, 13.7)    |
| ISRs                                                                                                                                                                                                                                                                                                                                                                                                                                                                                                                                                                                                                                   | 2 (3.5)<br>(0.6, 13.2)    | 1 (1.8)<br>(0.1, 10.6)    | 3 (2.6)<br>(0.7, 8.1)     | 2 (6.5)<br>(1.1, 22.8)    | 2 (6.5)<br>(1.1, 22.8)    |
| <p><sup>a</sup>Any SEC* for both the treatment groups (LD and HD) includes all patients treated with secukinumab from the start of the study and those who switched from placebo to secukinumab at Week 12</p> <p><sup>a</sup>AEs ordered according to pediatric population</p> <p>AE, adverse event; CI, confidence interval; ETN, etanercept; HD, high dose; ISR, injection-site reaction; LD, low dose; N, total number of patients; n, number of patients; NMQ, Novartis customized MedDRA Query; PBO, placebo; PT, preferred term; SAE, serious AE; SEC, secukinumab; SMQ, standardized MedDRA Query; SOC, system organ class</p> |                           |                           |                           |                           |                           |

**1.1.2. By Bodyweight**

The overall incidence of treatment-emergent AEs in patients treated with “Any secukinumab” dose was lower in the <25-kg subgroup (46.2%) compared with the 25- to <50- (49.1%) and the ≥50-kg (55.3%) bodyweight

subgroups (Table S8 [i], [ii] & [iii]). Neutropenia (NMQ, narrow) was observed in 15.4% and 3.2% in the <25- and ≥50-kg subgroups of the pediatric population who received “Any secukinumab,” respectively (Table S8 [i], [ii] & [iii]).

**Table S8. Absolute and relative frequencies for treatment-emergent AEs in the pediatric population by bodyweight strata: Up to Week 12 (Safety set)**

**(i) Bodyweight group: <25 kg**

| <b>Bodyweight group: &lt;25 kg</b>                                                                                                                                                                                                                                                                                                                                                                             |                         |                          |                          |                          |                         |
|----------------------------------------------------------------------------------------------------------------------------------------------------------------------------------------------------------------------------------------------------------------------------------------------------------------------------------------------------------------------------------------------------------------|-------------------------|--------------------------|--------------------------|--------------------------|-------------------------|
| <b>n (%) 95% CI</b>                                                                                                                                                                                                                                                                                                                                                                                            | <b>SEC LD<br/>N=6</b>   | <b>SEC HD<br/>N=7</b>    | <b>Any SEC<br/>N=13</b>  | <b>PBO<br/>N=3</b>       | <b>ETN<br/>N=4</b>      |
| <b>Total AEs</b>                                                                                                                                                                                                                                                                                                                                                                                               | 2 (33.3)<br>(6.0, 75.9) | 4 (57.1)<br>(20.2, 88.2) | 6 (46.2)<br>(20.4, 73.9) | 2 (66.7)<br>(12.5, 98.2) | 2 (50.0)<br>(9.2, 90.8) |
| <b>SAEs</b>                                                                                                                                                                                                                                                                                                                                                                                                    | None                    | None                     | None                     | None                     | None                    |
| <b>Treatment discontinuation due to AEs</b>                                                                                                                                                                                                                                                                                                                                                                    | None                    | None                     | None                     | None                     | None                    |
| <b>Top five most frequent AEs (by SOC)<sup>a</sup></b>                                                                                                                                                                                                                                                                                                                                                         |                         |                          |                          |                          |                         |
| Infections and infestations                                                                                                                                                                                                                                                                                                                                                                                    | 1 (16.7)<br>(0.9, 63.5) | 3 (42.9)<br>(11.8, 79.8) | 4 (30.8)<br>(10.4, 61.1) | 1 (33.3)<br>(1.8, 87.5)  | 0 (0.0)<br>(0.0, 60.4)  |
| Blood and lymphatic system disorders                                                                                                                                                                                                                                                                                                                                                                           | 1 (16.7)<br>(0.9, 63.5) | 2 (28.6)<br>(5.1, 69.7)  | 3 (23.1)<br>(6.2, 54.0)  | 1 (33.3)<br>(1.8, 87.5)  | 0 (0.0)<br>(0.0, 60.4)  |
| Eye disorders                                                                                                                                                                                                                                                                                                                                                                                                  | 0 (0.0)<br>(0.0, 48.3)  | 1 (14.3)<br>(0.8, 58.0)  | 1 (7.7)<br>(0.4, 37.9)   | 0 (0.0)<br>(0.0, 69.0)   | 0 (0.0)<br>(0.0, 60.4)  |
| Gastrointestinal disorders                                                                                                                                                                                                                                                                                                                                                                                     | 0 (0.0)<br>(0.0, 48.3)  | 1 (14.3)<br>(0.8, 58.0)  | 1 (7.7)<br>(0.4, 37.9)   | 0 (0.0)<br>(0.0, 69.0)   | 0 (0.0)<br>(0.0, 60.4)  |
| Investigations                                                                                                                                                                                                                                                                                                                                                                                                 | 0 (0.0)<br>(0.0, 48.3)  | 1 (14.3)<br>(0.8, 58.0)  | 1 (7.7)<br>(0.4, 37.9)   | 0 (0.0)<br>(0.0, 69.0)   | 1 (25.0)<br>(1.3, 78.1) |
| <b>Top five most frequent AEs (by PT)<sup>a</sup></b>                                                                                                                                                                                                                                                                                                                                                          |                         |                          |                          |                          |                         |
| Leukopenia                                                                                                                                                                                                                                                                                                                                                                                                     | 1 (16.7)<br>(0.9, 63.5) | 1 (14.3)<br>(0.8, 58.0)  | 2 (15.4)<br>(2.7, 46.3)  | 0 (0.0)<br>(0.0, 69.0)   | 0 (0.0)<br>(0.0, 60.4)  |
| Nasopharyngitis                                                                                                                                                                                                                                                                                                                                                                                                | 1 (16.7)<br>(0.9, 63.5) | 1 (14.3)<br>(0.8, 58.0)  | 2 (15.4)<br>(2.7, 46.3)  | 0 (0.0)<br>(0.0, 69.0)   | 0 (0.0)<br>(0.0, 60.4)  |
| Abdominal pain upper                                                                                                                                                                                                                                                                                                                                                                                           | 0 (0.0)<br>(0.0, 48.3)  | 1 (14.3)<br>(0.8, 58.0)  | 1 (7.7)<br>(0.4, 37.9)   | 0 (0.0)<br>(0.0, 69.0)   | 0 (0.0)<br>(0.0, 60.4)  |
| Asthma                                                                                                                                                                                                                                                                                                                                                                                                         | 0 (0.0)<br>(0.0, 48.3)  | 1 (14.3)<br>(0.8, 58.0)  | 1 (7.7)<br>(0.4, 37.9)   | 0 (0.0)<br>(0.0, 69.0)   | 0 (0.0)<br>(0.0, 60.4)  |
| Chalazion                                                                                                                                                                                                                                                                                                                                                                                                      | 0 (0.0)<br>(0.0, 48.3)  | 1 (14.3)<br>(0.8, 58.0)  | 1 (7.7)<br>(0.4, 37.9)   | 0 (0.0)<br>(0.0, 69.0)   | 0 (0.0)<br>(0.0, 60.4)  |
| <b>AEs of special interest</b>                                                                                                                                                                                                                                                                                                                                                                                 |                         |                          |                          |                          |                         |
| Infections and infestations (SOC)                                                                                                                                                                                                                                                                                                                                                                              | 1 (16.7)<br>(0.9, 63.5) | 3 (42.9)<br>(11.8, 79.8) | 4 (30.8)<br>(10.4, 61.1) | 1 (33.3)<br>(1.8, 87.5)  | 0 (0.0)<br>(0.0, 60.4)  |
| Neutropenia (NMQ) (narrow)                                                                                                                                                                                                                                                                                                                                                                                     | 1 (16.7)<br>(0.9, 63.5) | 1 (14.3)<br>(0.8, 58.0)  | 2 (15.4)<br>(2.7, 46.3)  | 0 (0.0)<br>(0.0, 69.0)   | 0 (0.0)<br>(0.0, 60.4)  |
| ISRs                                                                                                                                                                                                                                                                                                                                                                                                           | 0 (0.0)<br>(0.0, 48.3)  | 0 (0.0)<br>(0.0, 43.9)   | 0 (0.0)<br>(0.0, 28.3)   | 0 (0.0)<br>(0.0, 69.0)   | 1 (25.0)<br>(1.3, 78.1) |
| <p><sup>a</sup>“Any SEC” for both the treatment groups (LD and HD) includes all patients treated with SEC from the start of the study and those who switched from PBO to SEC at Week 12</p> <p><sup>a</sup>AEs ordered according to pediatric population</p> <p>AE, adverse event; CI, confidence interval; ETN, etanercept; HD, high dose; ISR, injection-site reaction; LD, low dose; N, total number of</p> |                         |                          |                          |                          |                         |

patients; n, number of patients; NMQ, Novartis customized MedDRA Query; PBO, placebo; PT, preferred term; SAE, serious AE; SEC, secukinumab; SMQ, Standardized MedDRA Query; SOC, system organ class

(ii) Bodyweight group:  $\geq 25$  to  $< 50$  kg

| <b>Bodyweight group: <math>\geq 25</math> kg and <math>&lt; 50</math> kg</b>                                                                                                                                                                                                                                                                                                                                                                                                                                                                                                                                    |                           |                           |                           |                          |                           |
|-----------------------------------------------------------------------------------------------------------------------------------------------------------------------------------------------------------------------------------------------------------------------------------------------------------------------------------------------------------------------------------------------------------------------------------------------------------------------------------------------------------------------------------------------------------------------------------------------------------------|---------------------------|---------------------------|---------------------------|--------------------------|---------------------------|
| <b>n (%) 95% CI</b>                                                                                                                                                                                                                                                                                                                                                                                                                                                                                                                                                                                             | <b>SEC LD<br/>N=30</b>    | <b>SEC HD<br/>N=27</b>    | <b>Any SEC<br/>N=57</b>   | <b>PBO<br/>N=17</b>      | <b>ETN<br/>N=16</b>       |
| <b>Total AEs</b>                                                                                                                                                                                                                                                                                                                                                                                                                                                                                                                                                                                                | 14 (46.7)<br>(28.8, 65.4) | 14 (51.9)<br>(32.4, 70.8) | 28 (49.1)<br>(35.8, 62.6) | 5 (29.4)<br>(11.4, 56.0) | 10 (62.5)<br>(35.9, 83.7) |
| <b>SAEs</b>                                                                                                                                                                                                                                                                                                                                                                                                                                                                                                                                                                                                     | 0 (0.0)<br>(0.0, 14.1)    | 1 (3.7)<br>(0.2, 20.9)    | 1 (1.8)<br>(0.1, 10.6)    | 0 (0.0)<br>(0.0, 22.9)   | 2 (12.5)<br>(2.2, 39.6)   |
| <b>Treatment discontinuation due to AEs</b>                                                                                                                                                                                                                                                                                                                                                                                                                                                                                                                                                                     | 0 (0.0)<br>(0.0, 14.1)    | 2 (7.4)<br>(1.3, 25.8)    | 2 (3.5)<br>(0.6, 13.2)    | 0 (0.0)<br>(0.0, 22.9)   | 0 (0.0)<br>(0.0, 24.1)    |
| <b>Top five most frequent AEs (by SOC)<sup>a</sup></b>                                                                                                                                                                                                                                                                                                                                                                                                                                                                                                                                                          |                           |                           |                           |                          |                           |
| Infections and infestations                                                                                                                                                                                                                                                                                                                                                                                                                                                                                                                                                                                     | 7 (23.3)<br>(10.6, 42.7)  | 8 (29.6)<br>(14.5, 50.3)  | 15 (26.3)<br>(15.9, 39.9) | 3 (17.6)<br>(4.7, 44.2)  | 6 (37.5)<br>(16.3, 64.1)  |
| Gastrointestinal disorders                                                                                                                                                                                                                                                                                                                                                                                                                                                                                                                                                                                      | 5 (16.7)<br>(6.3, 35.5)   | 5 (18.5)<br>(7.0, 38.7)   | 10 (17.5)<br>(9.2, 30.4)  | 2 (11.8)<br>(2.1, 37.7)  | 4 (25.0)<br>(8.3, 52.6)   |
| General disorders and administration-site conditions                                                                                                                                                                                                                                                                                                                                                                                                                                                                                                                                                            | 5 (16.7)<br>(6.3, 35.5)   | 1 (3.7)<br>(0.2, 20.9)    | 6 (10.5)<br>(4.4, 22.2)   | 1 (5.9)<br>(0.3, 30.8)   | 2 (12.5)<br>(2.2, 39.6)   |
| Skin and subcutaneous tissue disorders                                                                                                                                                                                                                                                                                                                                                                                                                                                                                                                                                                          | 4 (13.3)<br>(4.4, 31.6)   | 1 (3.7)<br>(0.2, 20.9)    | 5 (8.8)<br>(3.3, 20.0)    | 1 (5.9)<br>(0.3, 30.8)   | 0 (0.0)<br>(0.0, 24.1)    |
| Injury, poisoning, and procedural complications                                                                                                                                                                                                                                                                                                                                                                                                                                                                                                                                                                 | 3 (10.0)<br>(2.6, 27.7)   | 1 (3.7)<br>(0.2, 20.9)    | 4 (7.0)<br>(2.3, 17.8)    | 1 (5.9)<br>(0.3, 30.8)   | 0 (0.0)<br>(0.0, 24.1)    |
| <b>Top five most frequent AEs (by PT)<sup>a</sup></b>                                                                                                                                                                                                                                                                                                                                                                                                                                                                                                                                                           |                           |                           |                           |                          |                           |
| Abdominal pain                                                                                                                                                                                                                                                                                                                                                                                                                                                                                                                                                                                                  | 2 (6.7)<br>(1.2, 23.5)    | 2 (7.4)<br>(1.3, 25.8)    | 4 (7.0)<br>(2.3, 17.8)    | 0 (0.0)<br>(0.0, 22.9)   | 2 (12.5)<br>(2.2, 39.6)   |
| Nasopharyngitis                                                                                                                                                                                                                                                                                                                                                                                                                                                                                                                                                                                                 | 3 (10.0)<br>(2.6, 27.7)   | 1 (3.7)<br>(0.2, 20.9)    | 4 (7.0)<br>(2.3, 17.8)    | 1 (5.9)<br>(0.3, 30.8)   | 1 (6.3)<br>(0.3, 32.3)    |
| Arthropod bite                                                                                                                                                                                                                                                                                                                                                                                                                                                                                                                                                                                                  | 1 (3.3)<br>(0.2, 19.1)    | 1 (3.7)<br>(0.2, 20.9)    | 2 (3.5)<br>(0.6, 13.2)    | 0 (0.0)<br>(0.0, 22.9)   | 0 (0.0)<br>(0.0, 24.1)    |
| Asthenia                                                                                                                                                                                                                                                                                                                                                                                                                                                                                                                                                                                                        | 1 (3.3)<br>(0.2, 19.1)    | 1 (3.7)<br>(0.2, 20.9)    | 2 (3.5)<br>(0.6, 13.2)    | 0 (0.0)<br>(0.0, 22.9)   | 0 (0.0)<br>(0.0, 24.1)    |
| Conjunctivitis                                                                                                                                                                                                                                                                                                                                                                                                                                                                                                                                                                                                  | 1 (3.3)<br>(0.2, 19.1)    | 1 (3.7)<br>(0.2, 20.9)    | 2 (3.5)<br>(0.6, 13.2)    | 0 (0.0)<br>(0.0, 22.9)   | 0 (0.0)<br>(0.0, 24.1)    |
| <b>AEs of special interest</b>                                                                                                                                                                                                                                                                                                                                                                                                                                                                                                                                                                                  |                           |                           |                           |                          |                           |
| Infections and infestations (SOC)                                                                                                                                                                                                                                                                                                                                                                                                                                                                                                                                                                               | 7 (23.3)<br>(10.6, 42.7)  | 8 (29.6)<br>(14.5, 50.3)  | 15 (26.3)<br>(15.9, 39.9) | 3 (17.6)<br>(4.7, 44.2)  | 6 (37.5)<br>(16.3, 64.1)  |
| Hypersensitivity (SMQ) (narrow)                                                                                                                                                                                                                                                                                                                                                                                                                                                                                                                                                                                 | 1 (3.3)<br>(0.2, 19.1)    | 1 (3.7)<br>(0.2, 20.9)    | 2 (3.5)<br>(0.6, 13.2)    | 1 (5.9)<br>(0.3, 30.8)   | 2 (12.5)<br>(2.2, 39.6)   |
| ISRs                                                                                                                                                                                                                                                                                                                                                                                                                                                                                                                                                                                                            | 2 (6.7)<br>(1.2, 23.5)    | 0 (0.0)<br>(0.0, 15.5)    | 2 (3.5)<br>(0.6, 13.2)    | 1 (5.9)<br>(0.3, 30.8)   | 1 (6.3)<br>(0.3, 32.3)    |
| <p><sup>a</sup>“Any SEC” for both treatment groups (LD and HD) includes all patients treated with SEC from the start of the study and those who switched from PBO to SEC at Week 12</p> <p><sup>b</sup>AEs ordered according to pediatric population</p> <p>AE, adverse event; CI, confidence interval; ETN, etanercept; HD, high dose; ISR, injection-site reaction; LD, low dose; N, total number of patients; n, number of patients; NMQ, Novartis customized MedDRA Query; PBO, placebo; PT, preferred term; SAE, serious AE; SEC, secukinumab; SMQ, standardized MedDRA Query; SOC, system organ class</p> |                           |                           |                           |                          |                           |

(iii) Bodyweight group:  $\geq 50$  kg

| <b>Bodyweight group: <math>\geq 50</math> kg</b>                                                                                                                                                                                                                                                                                                                                                                                                                                                                                                                                   |                           |                           |                           |                           |                           |
|------------------------------------------------------------------------------------------------------------------------------------------------------------------------------------------------------------------------------------------------------------------------------------------------------------------------------------------------------------------------------------------------------------------------------------------------------------------------------------------------------------------------------------------------------------------------------------|---------------------------|---------------------------|---------------------------|---------------------------|---------------------------|
| <b>n (%) 95% CI</b>                                                                                                                                                                                                                                                                                                                                                                                                                                                                                                                                                                | <b>SEC LD<br/>N=46</b>    | <b>SEC HD<br/>N=48</b>    | <b>Any SEC<br/>N=94</b>   | <b>PBO<br/>N=21</b>       | <b>ETN<br/>N=21</b>       |
| <b>Total AEs</b>                                                                                                                                                                                                                                                                                                                                                                                                                                                                                                                                                                   | 26 (56.5)<br>(41.2, 70.8) | 26 (54.2)<br>(39.3, 68.4) | 52 (55.3)<br>(44.7, 65.5) | 15 (71.4)<br>(47.7, 87.8) | 13 (61.9)<br>(38.7, 81.0) |
| <b>SAEs</b>                                                                                                                                                                                                                                                                                                                                                                                                                                                                                                                                                                        | 1 (2.2)<br>(0.1, 13.0)    | 0 (0.0)<br>(0.0, 9.2)     | 1 (1.1)<br>(0.1, 6.6)     | 0 (0.0)<br>(0.0, 19.2)    | 2 (9.5)<br>(1.7, 31.8)    |
| <b>Treatment discontinuation due to AEs</b>                                                                                                                                                                                                                                                                                                                                                                                                                                                                                                                                        | 0 (0.0)<br>(0.0, 9.6)     | 0 (0.0)<br>(0.0, 9.2)     | 0 (0.0)<br>(0.0, 4.9)     | 1 (4.8)<br>(0.2, 25.9)    | 1 (4.8)<br>(0.2, 25.9)    |
| <b>Top five most frequent AEs (by SOC)<sup>a</sup></b>                                                                                                                                                                                                                                                                                                                                                                                                                                                                                                                             |                           |                           |                           |                           |                           |
| Infections and infestations                                                                                                                                                                                                                                                                                                                                                                                                                                                                                                                                                        | 18 (39.1)<br>(25.5, 54.6) | 18 (37.5)<br>(24.3, 52.7) | 36 (38.3)<br>(28.6, 48.9) | 12 (57.1)<br>(34.4, 77.4) | 5 (23.8)<br>(9.1, 47.5)   |
| Skin and subcutaneous tissue disorders                                                                                                                                                                                                                                                                                                                                                                                                                                                                                                                                             | 4 (8.7)<br>(2.8, 21.7)    | 6 (12.5)<br>(5.2, 25.9)   | 10 (10.6)<br>(5.5, 19.1)  | 2 (9.5)<br>(1.7, 31.8)    | 1 (4.8)<br>(0.2, 25.9)    |
| Gastrointestinal disorders                                                                                                                                                                                                                                                                                                                                                                                                                                                                                                                                                         | 2 (4.3)<br>(0.8, 16.0)    | 6 (12.5)<br>(5.2, 25.9)   | 8 (8.5)<br>(4.0, 16.6)    | 5 (23.8)<br>(9.1, 47.5)   | 6 (28.6)<br>(12.2, 52.3)  |
| General disorders and administration-site conditions                                                                                                                                                                                                                                                                                                                                                                                                                                                                                                                               | 1 (2.2)<br>(0.1, 13.0)    | 6 (12.5)<br>(5.2, 25.9)   | 7 (7.4)<br>(3.3, 15.2)    | 2 (9.5)<br>(1.7, 31.8)    | 2 (9.5)<br>(1.7, 31.8)    |
| Respiratory, thoracic, and mediastinal disorders                                                                                                                                                                                                                                                                                                                                                                                                                                                                                                                                   | 3 (6.5)<br>(1.7, 18.9)    | 3 (6.3)<br>(1.6, 18.2)    | 6 (6.4)<br>(2.6, 13.9)    | 1 (4.8)<br>(0.2, 25.9)    | 0 (0.0)<br>(0.0, 19.2)    |
| <b>Top five most frequent AEs (by PT)<sup>a</sup></b>                                                                                                                                                                                                                                                                                                                                                                                                                                                                                                                              |                           |                           |                           |                           |                           |
| Nasopharyngitis                                                                                                                                                                                                                                                                                                                                                                                                                                                                                                                                                                    | 9 (19.6)<br>(9.9, 34.4)   | 8 (16.7)<br>(8.0, 30.8)   | 17 (18.1)<br>(11.2, 27.7) | 0 (0.0)<br>(0.0, 19.2)    | 3 (14.3)<br>(3.8, 37.4)   |
| Pharyngitis                                                                                                                                                                                                                                                                                                                                                                                                                                                                                                                                                                        | 3 (6.5)<br>(1.7, 18.9)    | 2 (4.2)<br>(0.7, 15.4)    | 5 (5.3)<br>(2.0, 12.5)    | 3 (14.3)<br>(3.8, 37.4)   | 0 (0.0)<br>(0.0, 19.2)    |
| Dysmenorrhea                                                                                                                                                                                                                                                                                                                                                                                                                                                                                                                                                                       | 2 (4.3)<br>(0.8, 16.0)    | 2 (4.2)<br>(0.7, 15.4)    | 4 (4.3)<br>(1.4, 11.2)    | 0 (0.0)<br>(0.0, 19.2)    | 0 (0.0)<br>(0.0, 19.2)    |
| Headache                                                                                                                                                                                                                                                                                                                                                                                                                                                                                                                                                                           | 2 (4.3)<br>(0.8, 16.0)    | 2 (4.2)<br>(0.7, 15.4)    | 4 (4.3)<br>(1.4, 11.2)    | 2 (9.5)<br>(1.7, 31.8)    | 0 (0.0)<br>(0.0, 19.2)    |
| Neutropenia                                                                                                                                                                                                                                                                                                                                                                                                                                                                                                                                                                        | 2 (4.3)<br>(0.8, 16.0)    | 1 (2.1)<br>(0.1, 12.5)    | 3 (3.2)<br>(0.8, 9.7)     | 0 (0.0)<br>(0.0, 19.2)    | 0 (0.0)<br>(0.0, 19.2)    |
| <b>AEs of special interest</b>                                                                                                                                                                                                                                                                                                                                                                                                                                                                                                                                                     |                           |                           |                           |                           |                           |
| Infections and infestations (SOC)                                                                                                                                                                                                                                                                                                                                                                                                                                                                                                                                                  | 18 (39.1)<br>(25.5, 54.6) | 18 (37.5)<br>(24.3, 52.7) | 36 (38.3)<br>(28.6, 48.9) | 12 (57.1)<br>(34.4, 77.4) | 5 (23.8)<br>(9.1, 47.5)   |
| Hypersensitivity (SMQ) (narrow)                                                                                                                                                                                                                                                                                                                                                                                                                                                                                                                                                    | 2 (4.3)<br>(0.8, 16.0)    | 1 (2.1)<br>(0.1, 12.5)    | 3 (3.2)<br>(0.8, 9.7)     | 0 (0.0)<br>(0.0, 19.2)    | 0 (0.0)<br>(0.0, 19.2)    |
| Neutropenia (NMQ) (narrow)                                                                                                                                                                                                                                                                                                                                                                                                                                                                                                                                                         | 2 (4.3)<br>(0.8, 16.0)    | 1 (2.1)<br>(0.1, 12.5)    | 3 (3.2)<br>(0.8, 9.7)     | 0 (0.0)<br>(0.0, 19.2)    | 0 (0.0)<br>(0.0, 19.2)    |
| ISRs                                                                                                                                                                                                                                                                                                                                                                                                                                                                                                                                                                               | 1 (2.2)<br>(0.1, 13.0)    | 1 (2.1)<br>(0.1, 12.5)    | 2 (2.1)<br>(0.4, 8.2)     | 1 (4.8)<br>(0.2, 25.9)    | 1 (4.8)<br>(0.2, 25.9)    |
| <p>“Any SEC” for both the treatment groups (LD and HD) includes all patients treated with SEC from the start of the study and those who switched from placebo to SEC at Week 12</p> <p><sup>a</sup>AEs ordered according to pediatric population</p> <p>AE, adverse event; ETN, etanercept; HD, high dose; ISR, injection-site reaction; LD, low dose; N, total number of patients; n, number of patients; NMQ, Novartis customized MedDRA Query; PBO, placebo; PT, preferred term; SAE, serious AE; SEC, secukinumab; SMQ, standardized MedDRA Query; SOC, system organ class</p> |                           |                           |                           |                           |                           |



**Table S9: Absolute neutrophils: number (%) of patients with newly occurring or worsening CTCAE grades after baseline by treatment and bodyweight (pediatric pool) – Up to Week 52 (Safety set)**

| Criterion                             | Any SEC dose |                  |                     |                  |               |                  |
|---------------------------------------|--------------|------------------|---------------------|------------------|---------------|------------------|
|                                       | <25 kg, N=8  |                  | ≥25 to <50 kg, N=71 |                  | ≥50 kg, N=111 |                  |
|                                       | n/m          | % (95% CI)       | n/m                 | % (95% CI)       | n/m           | % (95% CI)       |
| Grade 1 (<LLN–1.5×10 <sup>9</sup> /L) | 0/15         | 0.0 (0.0, 25.3)  | 3/66                | 4.5 (1.2, 13.6)  | 13/107        | 12.1 (6.9, 20.2) |
| Grade 2 (<1.5–1.0×10 <sup>9</sup> /L) | 4/15         | 26.7 (8.9, 55.2) | 9/67                | 13.4 (6.7, 24.5) | 9/110         | 8.2 (4.0, 15.4)  |
| Grade 3 (<1.0–0.5×10 <sup>9</sup> /L) | 0/15         | 0.0 (0.0, 25.3)  | 1/68                | 1.5 (0.1, 9.0)   | 0/110         | 0.0 (0.0, 4.2)   |
| Grade 4 (<0.5×10 <sup>9</sup> /L)     | 0/15         | 0.0 (0.0, 25.3)  | 0/69                | 0.0 (0.0, 6.6)   | 0/110         | 0.0 (0.0, 4.2)   |

A patient with multiple variable measurements is counted only once under the worst condition.  
CTCAE, Common Terminology Criteria for Adverse Events; LLN, lower limit of normal; m, Number of patients with evaluable criterion who were better than the criterion at baseline; n, number of patients with most extreme value meeting the criterion post-baseline and that is newly occurring, or worsening compared to baseline; SEC, secukinumab.
